# Supplementary material for: Comprehensive serum metabolic and proteomic characterization on cognitive dysfunction in Parkinson’s disease
Source: PubMed Central journal article supplement — Ann Transl Med. 2021 Apr;9(7):559. doi: 10.21037/atm-20-4583 (PMC8105844; doi:10.21037/atm-20-4583), 2021-04
Supplement: atm-09-07-559-supplementary.pdf [file atm-09-07-559-supplementary.pdf]

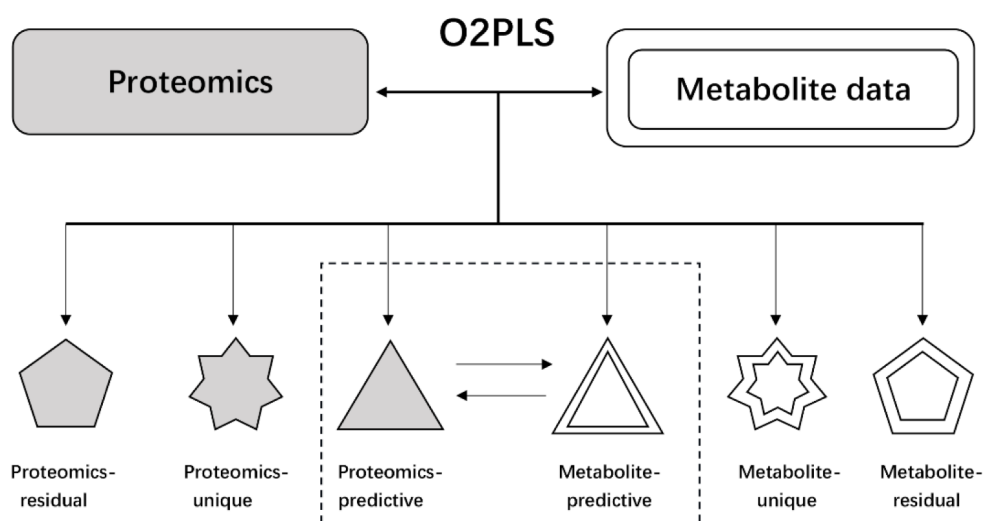

**Figure S1** The concept map of O2PLS method.

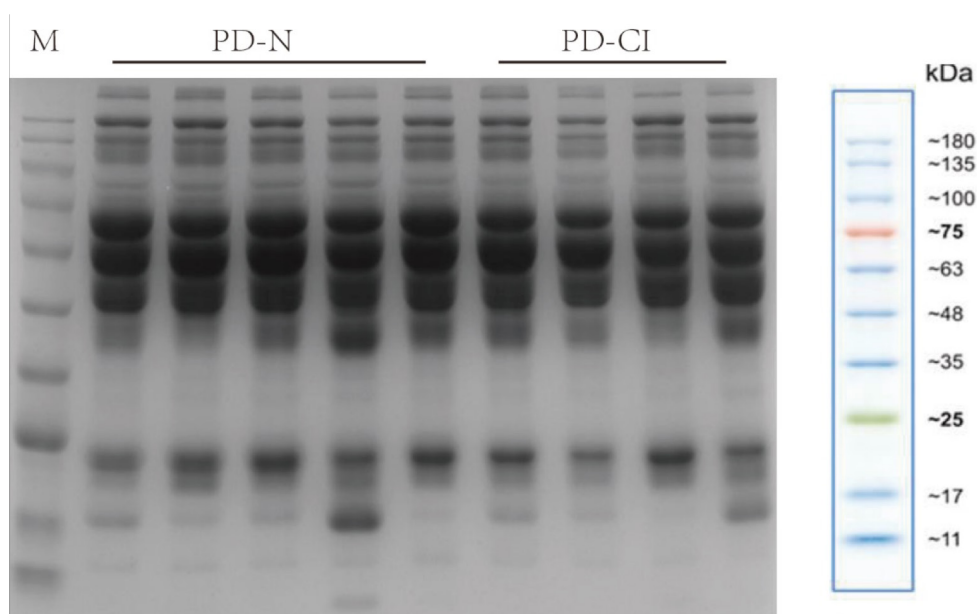

**Figure S2** SDS-PAGE analysis of quality control for samples.

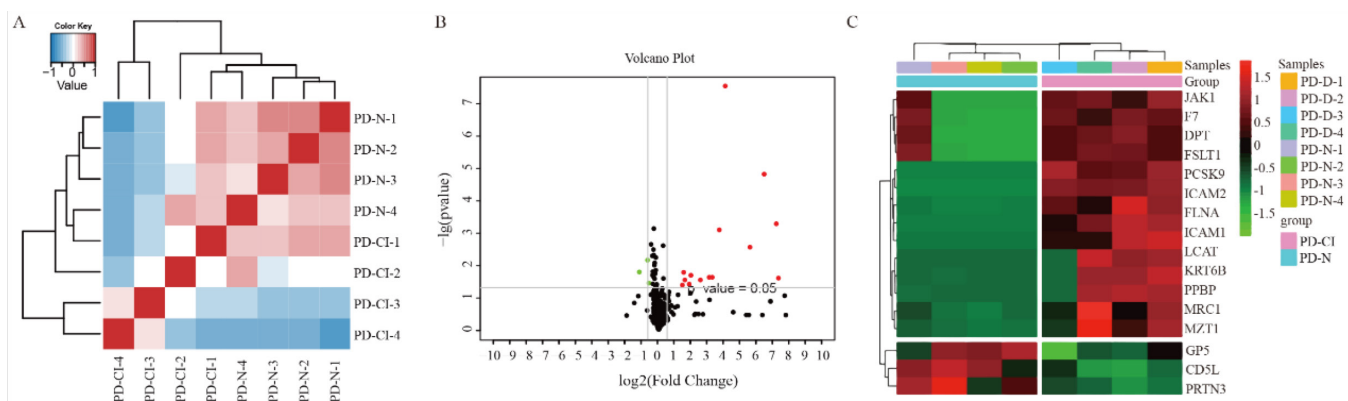

**Figure S3** Serum differentially expressed proteins between PD-CI and PD-N. (A) Correlation analysis between samples. The color changes from white to blue, indicating negative correlation. The color varies from white to red, indicating a positive correlation. The closer the correlation coefficient is to 1 (-1), the higher the similarity of the expression patterns between samples. (B) Volcano plots of differential protein expression analysis. The red dot represents the expression of the up-regulated protein, and the green dot represents the expression of the down-regulated protein, and the black dot represents the site with no significant difference. Abscissa: the ratio of the relative expression of protein in the two groups of samples, that is Fold Change and log<sub>2</sub> logarithmic processing. Ordinate: P value and -Log<sub>10</sub> logarithmic processing. (C) Cluster analysis of differential protein. The color changes from green to red, indicating that the expression of protein in each sample changes from low to high.

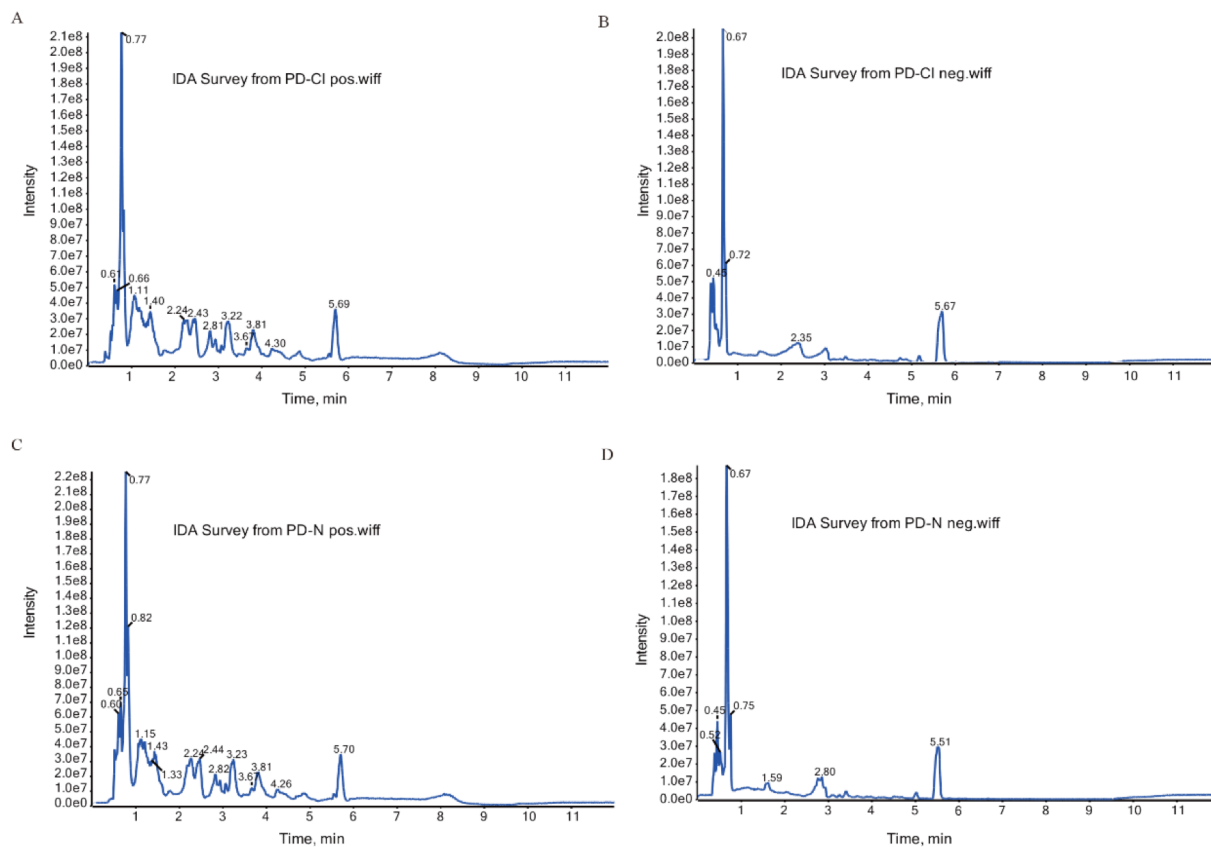

**Figure S4** Typical TICs of metabolic profiles in PD-CI and PD-N based on UHPLC-Q-TOF/MS analysis. (A) positive ion mode of PD-CI; (B) negative ion mode of PD-CI; (C) positive ion mode of PD-N; (D) negative ion mode of PD-N.

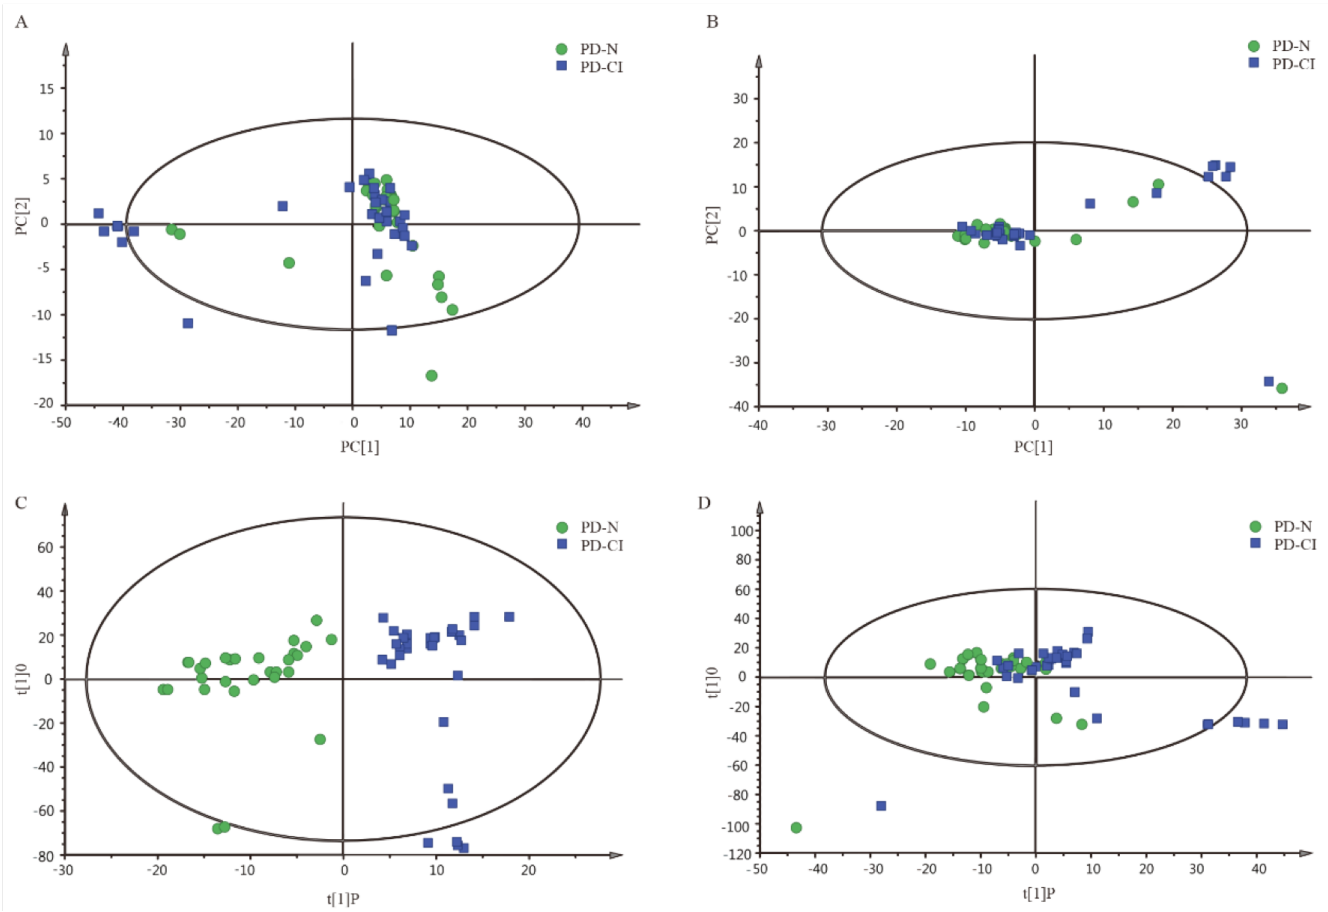

**Figure S5** PCA score plots and OPLS-DA score plots of metabolic profiles in PD-CI and PD-N. (A) PCA score plot in the positive mode; (B) PCA score plot in the negative mode; (C) OPLS-DA score plot in the positive mod; (D) OPLS-DA score plot in the negative mod. Boxes and dots denote samples from PD-CI and PD-N, respectively.

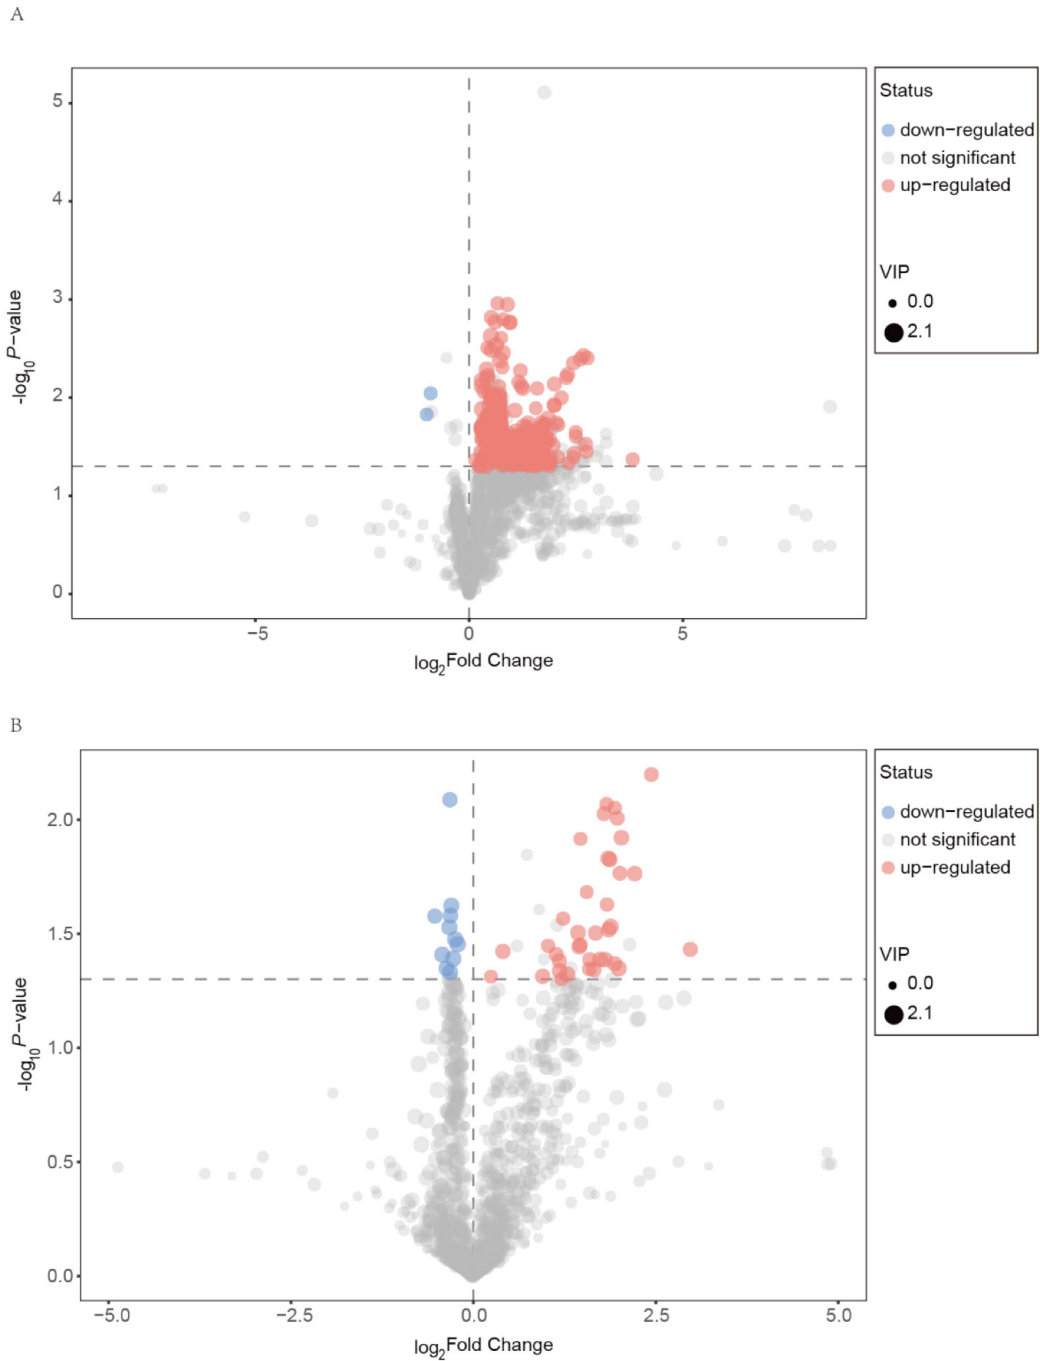

**Figure S6** Volcano plot for PD-CI group versus PD-N group. (A) Volcano plot in the positive mode. (B) Volcano plot in the negative mode. Each point in the volcano plot represents a metabolite, the abscissa represents the fold change of each substance (take the base 2 logarithm), and the ordinate represents the P-value of the t test (take the negative of the base 10 logarithm). The scatter size represents the VIP value of the OPLS-DA model. The larger the VIP value, the larger the scatter. The scatter color represents the final screening result, the significantly up-regulated metabolites are shown in red, the significantly down-regulated metabolites are shown in blue, and the non-significantly different metabolites are gray.

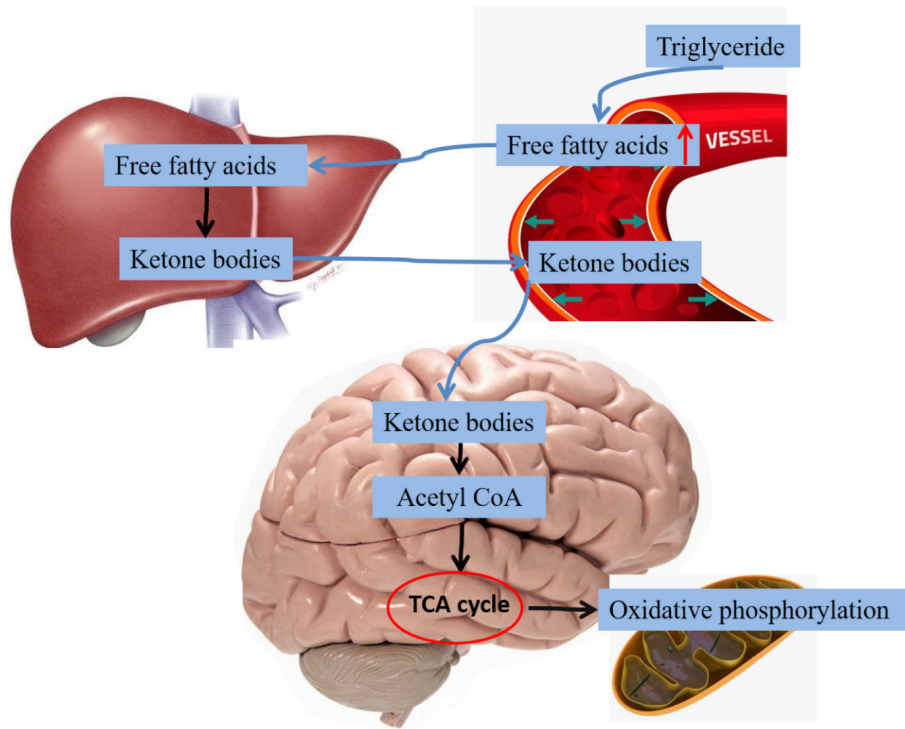

**Figure S7** Concept map of fat metabolism.
